# Supplementary material for: Three-dimensional MoSx(1 < x < 2) nanosheets decorated graphene aerogel for lithium–oxygen batteries
Source: Royal Society of Chemistry journal article supplement (doi:10.1039/c6ta03804b), 2016-01-01
Supplement: c6ta03804b1.pdf [file c6ta03804b1.pdf]

Supporting information for

## **Three-dimensional MoS<sub>x</sub> (1 < x < 2) Nanosheets Decorated Graphene Aerogel for Lithium-oxygen Batteries**

Liangyu Li,<sup>a</sup> Chunguang Chen,<sup>a</sup> Junming Su,<sup>a</sup> Peng Kuang,<sup>a</sup> Yu Yao,<sup>b</sup> Tao Huang,<sup>a</sup>  
Aishui Yu<sup>\*a</sup>

<sup>a</sup> Department of Chemistry, Shanghai Key Laboratory of Molecular Catalysis and  
Innovative Materials, Institute of New Energy, Collaborative Innovation Center of  
Chemistry for Energy Materials, Fudan University, Shanghai 200438, China. \*E-mail:

asyu@fudan.edu.cn; Fax: +86-21-51630320; Tel: +86-21-51630320

<sup>b</sup> Shanghai Institute of Space Power-Sources, Shanghai 200245, China.

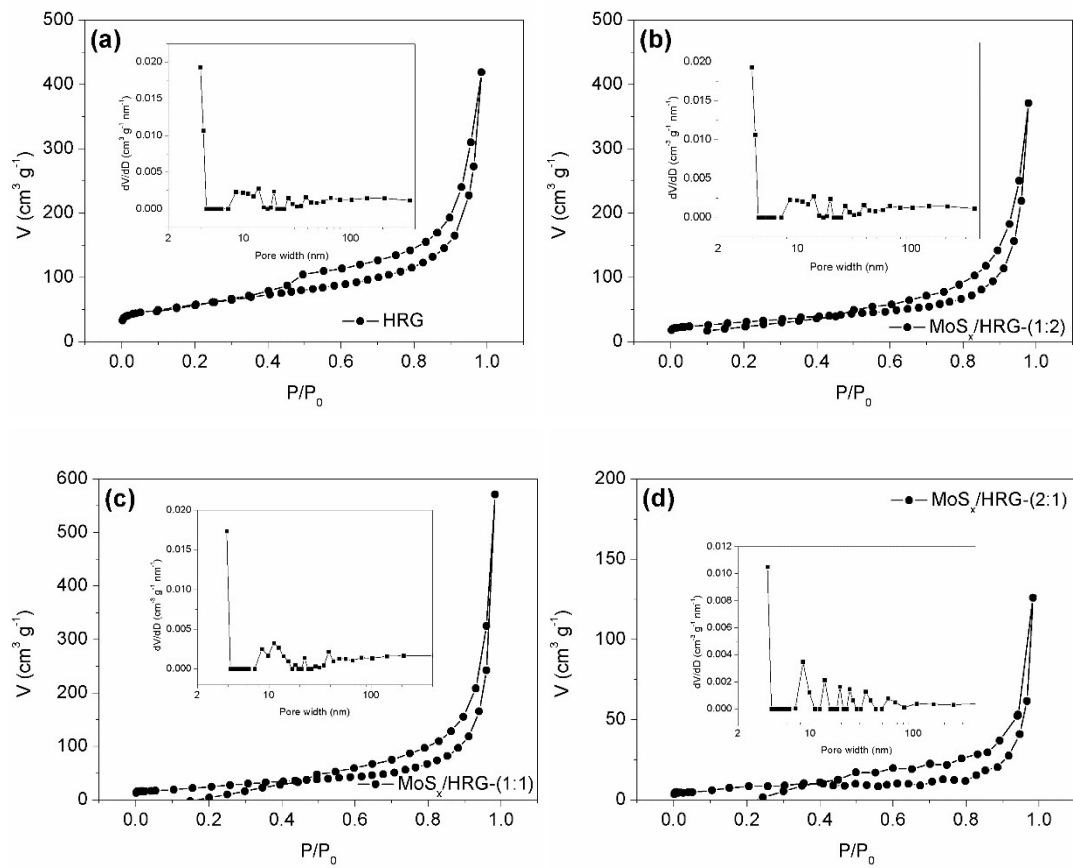

**Figure S1** Nitrogen adsorption-desorption isotherm and pore-size distribution (insert) of HRG,  $\text{MoS}_x/\text{HRG}$ -(1:2),  $\text{MoS}_x/\text{HRG}$ -(1:1) and  $\text{MoS}_x/\text{HRG}$ -(2:1).

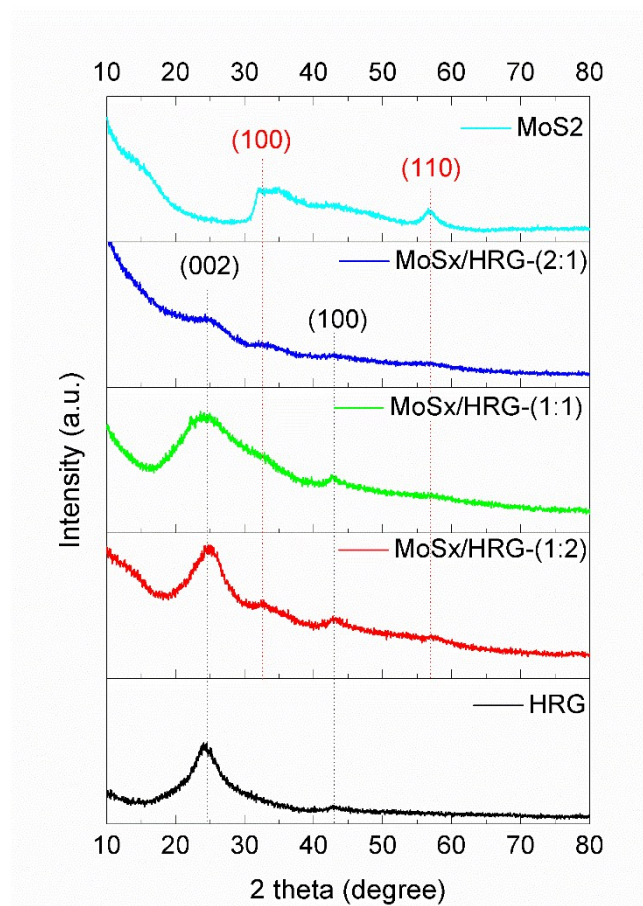

**Figure S2** The XRD patterns of HRG, MoS<sub>x</sub>/HRG-(1:2), MoS<sub>x</sub>/HRG-(1:1), MoS<sub>x</sub>/HRG-(2:1) and pure MoS<sub>2</sub>.

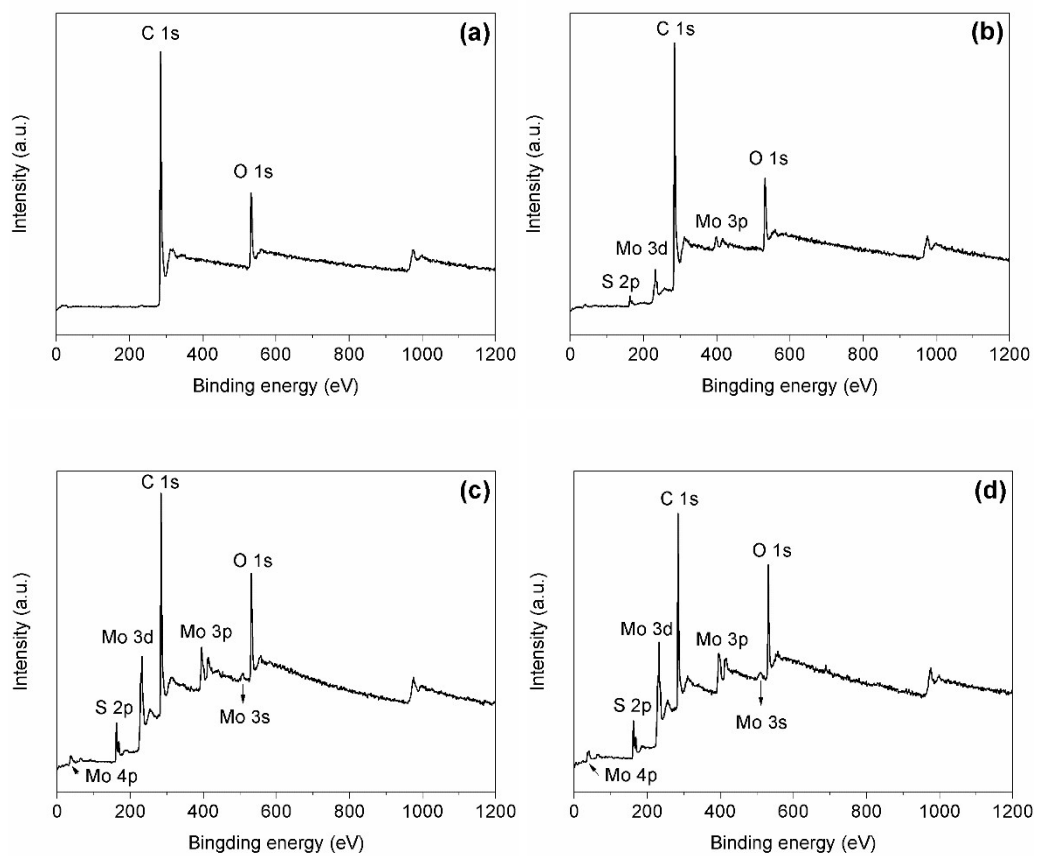

**Figure S3** XPS survey spectra of (a) HRG, (b) MoS<sub>x</sub>/HRG-(1:2), (c) MoS<sub>x</sub>/HRG-(1:1) and (d) MoS<sub>x</sub>/HRG-(2:1).

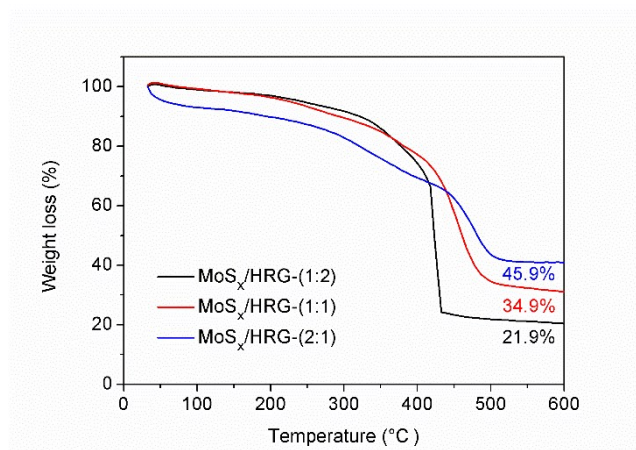

**Figure S4** TG curves in flowing oxygen of three MoS<sub>x</sub>/HRG aerogels. The presented percentage of MoS<sub>x</sub> was gotten through calculations because of the oxidation of MoS<sub>x</sub> to MoO<sub>3</sub>. The mole ratio of MoS<sub>2</sub> to MoO<sub>3</sub> and Mo<sub>2</sub>S<sub>5</sub> to MoO<sub>3</sub> is 1:1 and 1:2. And the ratio of MoS<sub>2</sub>, Mo<sub>2</sub>S<sub>5</sub> and MoO<sub>3</sub> in each aerogel is based on Table 1.

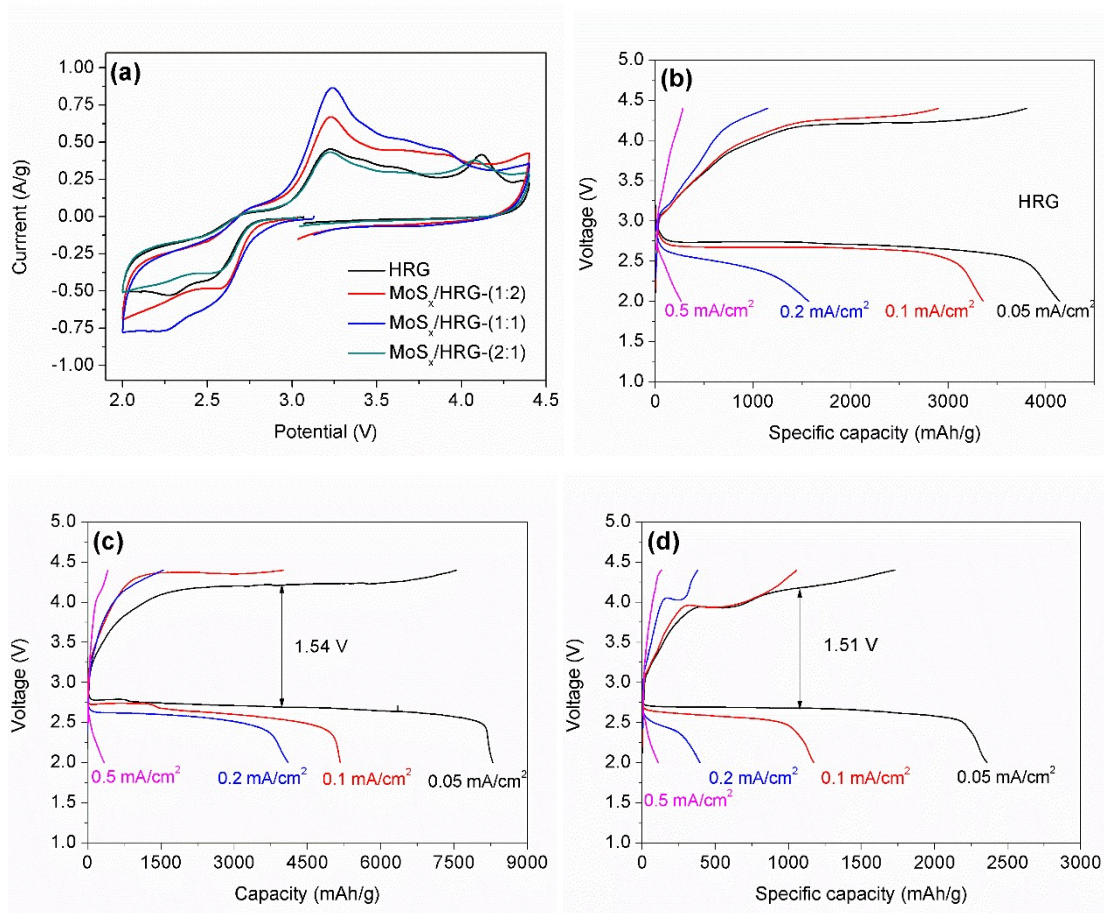

**Figure S5** (a) Cyclic voltammetry curves of four samples. Rate capacities of Li-O<sub>2</sub> batteries based on (b) HRG, (c) MoS<sub>x</sub>/HRG-(1:1) and (d) MoS<sub>x</sub>/HRG-(2:1).

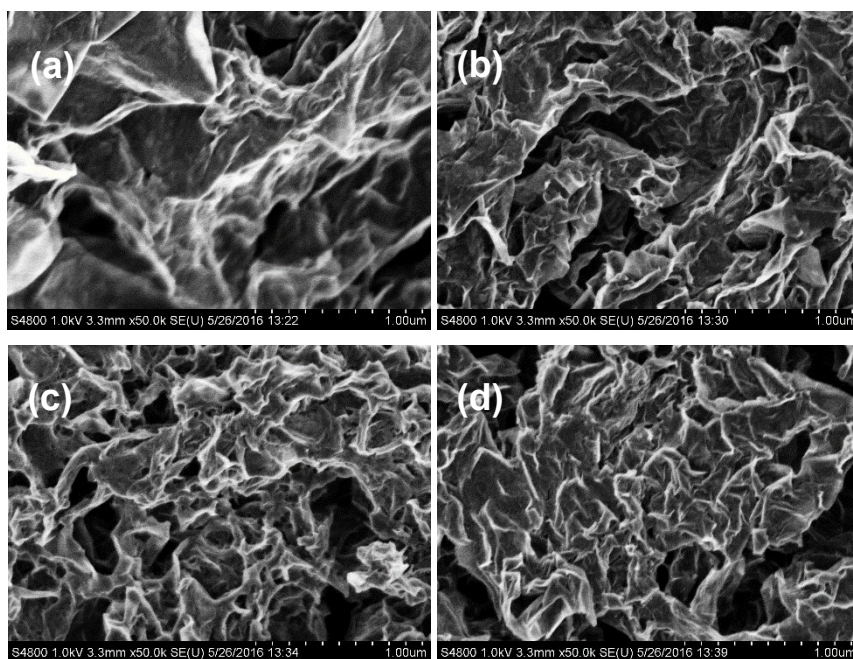

**Figure S6** SEM images of four samples after first discharge at current density of  $0.5 \text{ mA cm}^{-2}$  (a) HRG, (b)  $\text{MoS}_x/\text{HRG}$ -(1:2), (c)  $\text{MoS}_x/\text{HRG}$ -(1:1) and (d)  $\text{MoS}_x/\text{HRG}$ -(2:1).

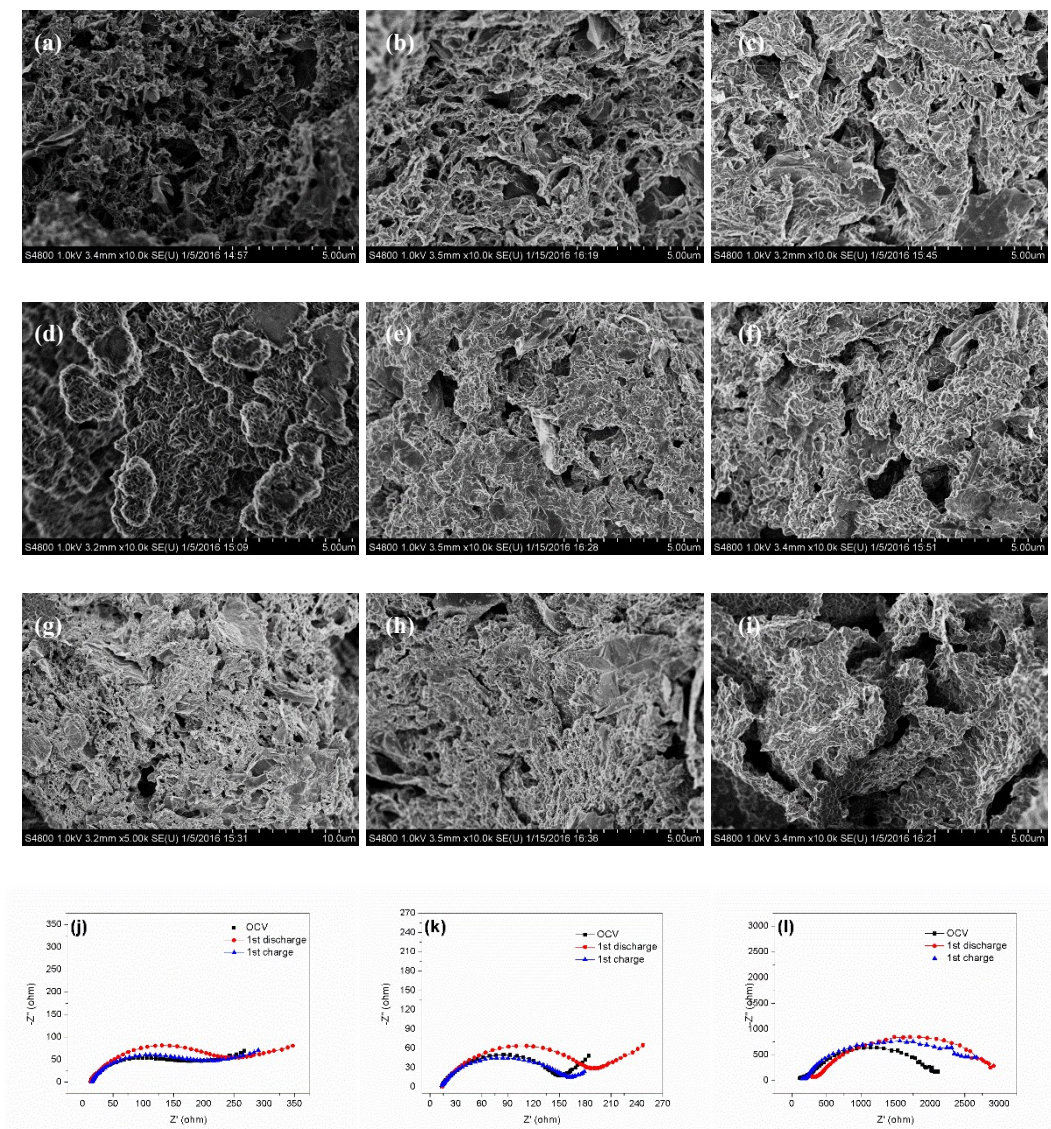

**Figure S7** SEM images of three samples at current density of  $0.05 \text{ mA cm}^{-2}$  for HRG (a) pristine, (d) after first discharge, (g) after first charge,  $\text{MoS}_x/\text{HRG}$ -(1:1) (b) pristine, (e) after first discharge, (h) after first charge and  $\text{MoS}_x/\text{HRG}$ -(2:1) (c) pristine, (f) after first discharge, (i) after first charge. (j), (k) and (l) are electrochemical impedance spectra of the HRG,  $\text{MoS}_x/\text{HRG}$ -(1:1) and  $\text{MoS}_x/\text{HRG}$ -(2:1) electrodes in the first cycle, respectively.



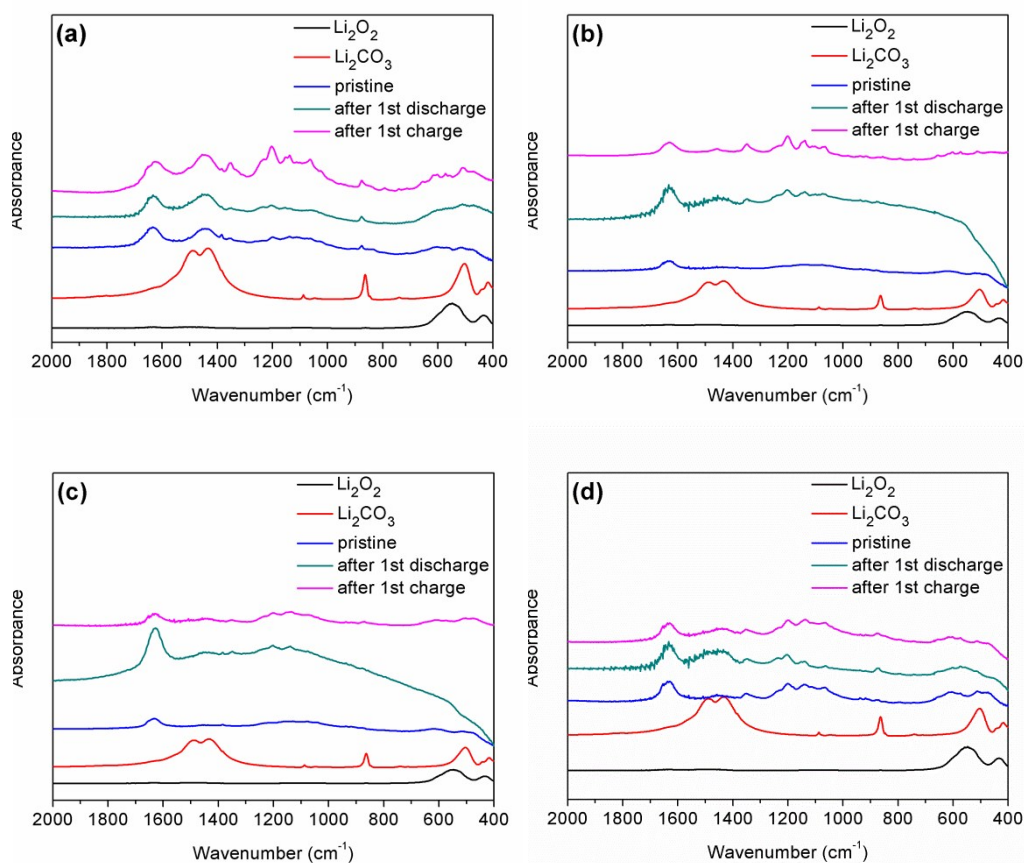

**Figure S8** FTIR spectra of the four samples' electrodes in the first cycle at current density of  $0.05 \text{ mA cm}^{-2}$ , (a) HRG, (b)  $\text{MoS}_x/\text{HRG}$ -(1:2), (c)  $\text{MoS}_x/\text{HRG}$ -(1:1) and (d)  $\text{MoS}_x/\text{HRG}$ -(2:1).

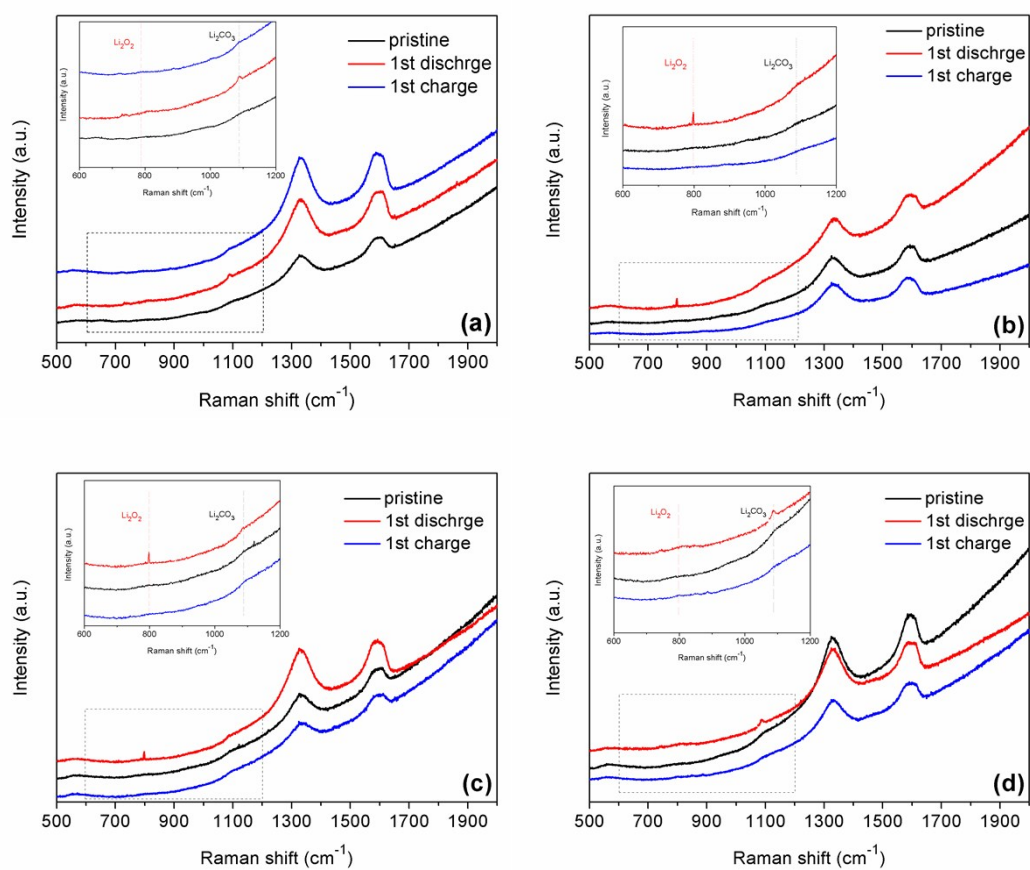

**Figure S9** Raman spectra of the four samples' electrodes in the first cycle at current density of  $0.05 \text{ mA cm}^{-2}$ , (a) HRG, (b)  $\text{MoS}_x/\text{HRG}$ -(1:2), (c)  $\text{MoS}_x/\text{HRG}$ -(1:1) and (d)  $\text{MoS}_x/\text{HRG}$ -(2:1).
